# Supplementary figures and images for: Evolution of Bacterial Persistence to Antibiotics during a 50,000-Generation Experiment in an Antibiotic-Free Environment
Source: MDPI journal article supplement (doi:10.3390/antibiotics11040451), 2022-03-27

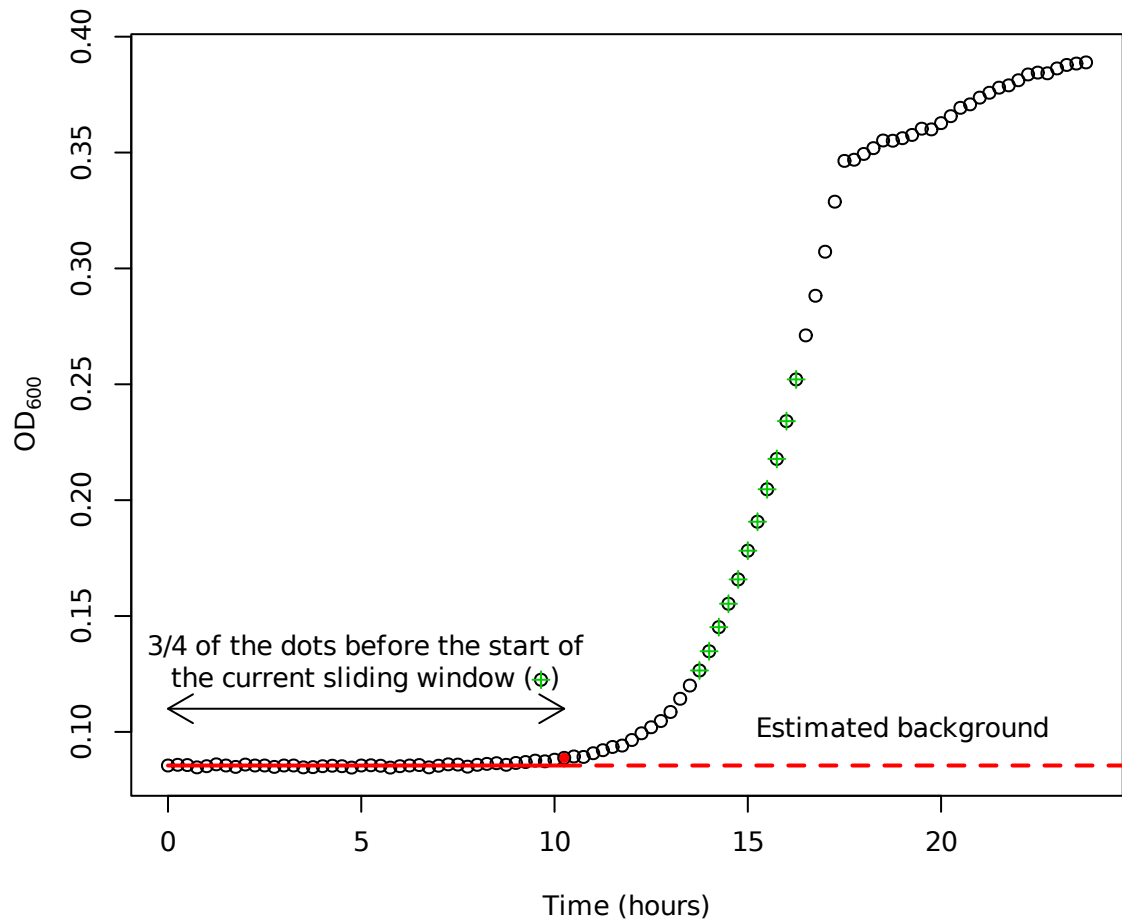

Supplement: s1 [file s1]

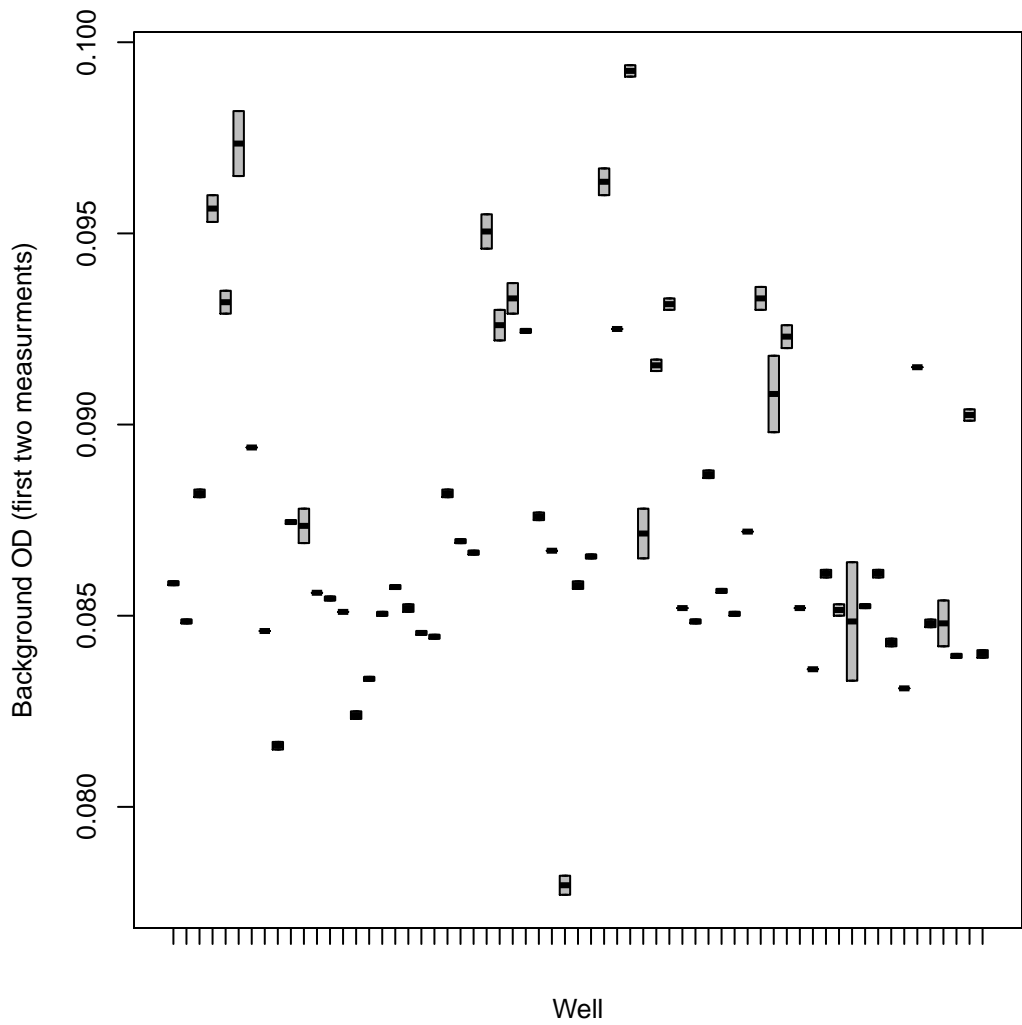

Supplement: s1 [file s1]
